# Supplementary material
Source: PubMed Central journal article supplement (PMC4587461)
Supplement: supp_pp.15.00783_PP2015-00783R1_Supplemental_Materialfig1.pdf [file supp_pp.15.00783_PP2015-00783R1_Supplemental_Materialfig1.pdf]

↓

|                |                                                                          |
|----------------|--------------------------------------------------------------------------|
| Wt <i>DD43</i> | TTTCTAGAATACCCT <b>CCGTAC</b> <u>GTACAAGTACAAGGGAC</u> TTGTGAGTTGTA      |
| D12-1c         | TTTCTAGAATACCCT <b>CCGTAC</b> - <u>GTACAAGTACAAGGGAC</u> TTGTGAGTTGTA    |
| D5-6c          | TTTCTAGAATACCCT <b>CCGTAC</b> - <u>TACAAGTACAAGGGAC</u> TTGTGAGTTGTA     |
| D5-3a          | TTTCTAGAATACCCT <b>CCGTAC</b> -- <u>ACAAGTACAAGGGAC</u> TTGTGAGTTGTA     |
| D12-4c         | TTTCTAGAATACCCT <b>CCGTACG</b> -- <u>CAAGTACAAGGGAC</u> TTGTGAGTTGTA     |
| D1-20b         | TTTCTAGAATACCCT <b>CCGTAC</b> --- <u>CAAGTACAAGGGAC</u> TTGTGAGTTGTA     |
| E5-1a          | TTTCTAGAATACCCT <b>CCGTAC</b> --- <u>ACAAGTACAAGGGAC</u> TTGTGAGTTGTA    |
| D5-1a          | TTTCTAGAATACCCT <b>CCGTAC</b> --- <u>AAGTACAAGGGAC</u> TTGTGAGTTGTA      |
| E12-4b         | TTTCTAGAATACCCT <b>CCGTAC</b> --- <u>AAGTACAAGGGAC</u> TTGTGAGTTGTA      |
| D5-11b         | TTTCTAGAATACCCT <b>CCGTAC</b> ---- <u>AGTACAAGGGAC</u> TTGTGAGTTGTA      |
| D5-4a          | TTTCTAGAATACCCT <b>CCGTAC</b> ---- <u>AGTACAAGGGG</u> TTGTGAGTTGTA       |
| D12-2a         | TTTCTAGAATACCCT <b>CCGTAC</b> ----- <u>TACAAGGGAC</u> TTGTGAGTTGTA       |
| D5-14a         | TTTCTAGAATACCCT <b>CCGTAC</b> ----- <u>ACAAGGGAC</u> TTGTGAGTTGTA        |
| D1-17a         | TTTCTAGAATACCCT <b>CCGTAC</b> ----- <u>CAAGGGAC</u> TTGTGAGTTGTA         |
| D5-16c         | TTTCTAGAATACCCT <b>CCGTAC</b> ----- <u>AAGGGAC</u> TTGTGAGTTGTA          |
| E8-1a          | TTTCTAGAATACCCT <b>CCGTAC</b> ----- <u>AGGGAC</u> TTGTGAGTTGTA           |
| D5-5c          | TTTCTAGAATACCCT <b>CCGTAC</b> ----- <u>GGGAC</u> TTGTGAGTTGTA            |
| E5-1b          | TTTCT----- <u>TACAAGTACAAGGGAC</u> TTGTGAGTTGTA                          |
| E6-7c          | TTTCTAGAATAACCT^TTAATTTA----- <u>GGAC</u> TTGTGAGTTGTA                   |
| D1-10c         | TTTCTAGAATACCCT <b>CCGTAC</b> ^38-- <u>TACAAGTACAAGGGAC</u> TTGTGAGTTGTA |
| E1-9a          | TTTCTAGAATACCCT <b>CCGTAC</b> ^110----- <u>AAGGGAC</u> TTGTGAGTTGTA      |
| E5-4b          | TTTCTAGAATACCCT <b>CCGTAC</b> ^125 <u>GTACAAGTACAAGGGAC</u> TTGTGAGTTGTA |
| D5-16a         | TTTCTAGAATACCCT <b>CCGTAC</b> ^130----- <u>TACAAGGGAC</u> TTGTGAGTTGTA   |
| E9-1c          | TTTCTAGAATACCCT <b>CCGTAC</b> ^154 <u>GTACAAGTACAAGGGAC</u> TTGTGAGTTGTA |
| D1-10a         | TTTCTAGAATACCCT <b>CCGTAC</b> ^167 <u>GTACAAGTACAAGGGAC</u> TTGTGAGTTGTA |
| D5-3b          | TTTCTAGAATACCCT <b>CCGTAC</b> ^171 <u>GTACAAGTACAAGGGAC</u> TTGTGAGTTGTA |
| E9-1a          | TTTCTAGAATACCCT <b>C</b> ^177----- <u>TACAAGTACAAGGGAC</u> TTGTGAGTTGTA  |
| E1-9b          | TTTCTAGAATACCCT <b>CCGTAC</b> ^190 <u>GTACAAGTACAAGGGAC</u> TTGTGAGTTGTA |
| D1-11a         | TTTCTAGAATACCCT <b>CCGTAC</b> ^220 <u>GTACAAGTACAAGGGAC</u> TTGTGAGTTGTA |

**Supplemental Figure 1.** Target site alterations of selected *DD43* NHEJ events. The top row is 50 bp wild type sequence (complementary strand) surrounding the *DD43* target site (underlined) with the PAM sequence in bold cases. Other rows are corresponding unique sequences of selected *DD43* NHEJ events. “-” indicates a deleted nucleotide. “^” indicates an insertion. The sequence or number following “^” indicates the insert sequence or size. Blast searches reveal that the inserts are of soybean genome sequence origin.
