# Supplementary material
Source: PubMed Central journal article supplement (PMC4587461)
Supplement: supp_pp.15.00783_PP2015-00783R1_Supplemental_Materialfig2.pdf [file supp_pp.15.00783_PP2015-00783R1_Supplemental_Materialfig2.pdf]

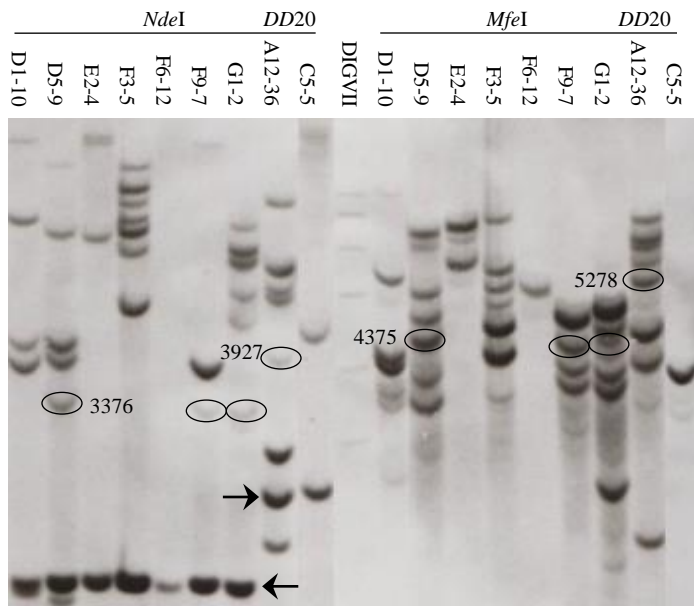

**Supplemental Figure 2.** Southern hybridization analysis of putative HDR T0 plants. Genomic DNA of seven *DD43* and two *DD20* T0 plants were digested with *NdeI* or *MfeI* to check the 5' and 3' borders using a *HPT* gene probe. Three *DD43* plants D5-9, F9-7, and G1-2 contained the predicted HDR-specific 5' border 5136 bp *NdeI* band and 3' border 4375 bp *MfeI* band (circled). A predicted 1748 bp common *NdeI* band was detected in all *DD43* samples (arrow). One *DD20* plant A12-36 contained the predicted HDR-specific 5' border 3927 bp *NdeI* band and 3' border 5278 bp *MfeI* band (circled). A predicted 2427 bp common *NdeI* band was detected in both *DD20* samples (arrow). The displayed DIGVII markers are 8576, 7427, 6106, 4899, 3639, and 2799 bp.
